# Supplementary material
Source: Research Square preprint supplement (doi:10.21203/rs.3.rs-8929034/v1)
Supplement: Supplementary file 1 [file e827f22466721b392a42b460.pdf]

1 Supporting Information for

2 **Forest carbon gains from environmental and management changes reduce**  
3 **conversion pressure on natural land**

4 **Meng Luo<sup>1</sup>, Adam Daigneault<sup>2</sup>, Dalei Hao<sup>3</sup>, Xin Zhao<sup>4,5</sup>, Alice Favero<sup>6</sup>, Christopher**  
5 **P.O. Reyer<sup>7</sup>, Akihiko Ito<sup>8</sup>, Sian Kou-Giesbrecht<sup>9</sup>, Qing Zhu<sup>10</sup>, Brent Sohngen<sup>11</sup>, Min**  
6 **Chen<sup>1\*</sup>**

7 <sup>1</sup>Department of Forest and Wildlife Ecology, University of Wisconsin-Madison, United  
8 States of America.

9 <sup>2</sup>School of Forest Resources, University of Maine, United States of America.

10 <sup>3</sup>Atmospheric, Climate, & Earth Sciences Division, Pacific Northwest National Laboratory,  
11 United States of America.

12 <sup>4</sup>Joint Global Change Research Institute, Pacific Northwest National Laboratory, United  
13 States of America.

14 <sup>5</sup>Center for Global Sustainability, School of Public Policy, University of Maryland, College  
15 Park, Maryland, United States of America.

16 <sup>6</sup>RTI International, Center for Applied Economics and Strategy, 3040 E Cornwallis Rd,  
17 Durham, NC, United States of America.

18 <sup>7</sup>Potsdam Institute for Climate Impact Research, Member of the Leibniz Association,  
19 Germany.

20 <sup>8</sup>Graduate School of Agricultural and Life Sciences, The University of Tokyo, 1-1-1  
21 Yayoi, Bunkyo-ku, Tokyo, 113-8657, Japan.

22 <sup>9</sup>School of Resource and Environmental Management, Simon Fraser University, Canada

23

24 <sup>10</sup> Climate and Ecosystem Sciences Division, Lawrence Berkeley National Lab, Berkeley,  
25 CA 94720, United States of America.

26 <sup>11</sup> Department of Agricultural, Environmental and Development Economics, the Ohio State  
27 University, Columbus, OH, United States of America.

28

29

30 Corresponding author: Min Chen (min.chen@wisc.edu)

31

32

33 **Contents of this file**

34

35 Texts S1–S3

36 Tables S1–S4

37 Figures S1–S19

38

39

40 **Text S1. Impacts of Terrestrial Biosphere Model (TBM) and climate forcing uncertainty**  
41 **in forest carbon stocks and land use simulations**

42 **S1.1. Forest vegetation, soil carbon, and total carbon stocks**

43 For forest vegetation carbon stocks under the combined effect of environmental  
44 changes and forest management (Envir\_Manage), the Vegetation Integrative Simulator for  
45 Trace gases (VISIT) simulations driven by different climate forcings — the Geophysical  
46 Fluid Dynamics Laboratory Earth System Model version 4 (GFDL), the United Kingdom  
47 Earth System Model version 1-0-LL (UKESM), the Institute Pierre-Simon Laplace Climate  
48 Model version 6A–Low Resolution (IPSL), the Max Planck Institute Earth System Model  
49 version 1.2–High Resolution (MPI), and the Meteorological Research Institute Earth System  
50 Model version 2.0 (MRI) — show a consistent global increasing trend under both SSP126  
51 and SSP585 (Fig. 1b,d). Differences across climate forcings are primarily in magnitude rather  
52 than direction, and spatial patterns are generally more consistent under SSP585 than under  
53 SSP126 across climate forcings (Fig. S7). A similar level of consistency across forcings is  
54 found for the environmental (Envir\_only) and forest management (Manage\_only) effects  
55 (Fig. 1f,h,j,l). Across VISIT simulations and VISIT-driven GTM simulations, the combined  
56 effect also shows similar temporal trends in total forest carbon stocks (vegetation + soil),  
57 again with differences primarily in magnitude. In contrast to vegetation carbon stocks, the  
58 direction of soil carbon stock changes is less consistent across forcings (Fig. S17), in line  
59 with the relatively higher uncertainty in soil carbon stock responses reported in previous  
60 studies<sup>1–3</sup>.

61 Across TBMs, the global patterns of forest carbon stock changes are similar, but  
62 VISIT typically produces larger increases in forest vegetation carbon stocks than the  
63 Canadian Land Surface Scheme Including Biogeochemical Cycles (CLASSIC), especially  
64 under SSP126 (Fig. S5). These TBM differences reflect their environmental change–induced  
65 forest carbon changes: VISIT simulates an overall larger increase (or smaller decrease) in  
66 total forest carbon than CLASSIC, for both vegetation and soil carbon densities (Figs. 1 and  
67 S3–S4). In CLASSIC simulations, declines in soil carbon can partially offset vegetation  
68 gains, leading to small net decreases in total forest carbon when only the environmental  
69 change effect is considered, particularly under SSP585. When management effects are  
70 included, however, the combined effect leads to a net increase in total forest carbon under  
71 SSP126 (Fig. S5), underscoring the importance of forest management, especially in a world  
72 with relatively low CO<sub>2</sub> fertilisation.

## 73 **S1.2. Natural land area changes**

74 For the combined effect of environmental changes and forest management  
75 (Envir\_Manage), GCAM land use projections driven by VISIT simulations under different  
76 climate forcings (GFDL, UKESM, IPSL, MPI, MRI) show broadly similar global trends in  
77 total natural land change under both SSP126 and SSP585 (Fig. S15a,e). At the level of  
78 individual land use types, the direction of change is also generally consistent across forcings  
79 (Table S4; Figs. S18–S19). For the individual effects (environmental changes, forest  
80 management, and their interaction), VISIT-based simulations driven by different climate  
81 forcings show similar trends in total natural land change and generally consistent changes  
82 across detailed land use types under both SSP126 and SSP585 (Fig. S15b–d,f–h; Table S3).  
83 The spread in magnitude across forcings is largest for the environmental change effect, which  
84 is expected given its larger overall contribution to land use change relative to the  
85 management and interaction effects.

86 When comparing across TBMs, total natural land exhibits broadly similar trajectories  
87 for the combined effect and each individual driver (Fig. S14j–l,n–p), but differences become  
88 more pronounced for detailed unmanaged types, particularly under SSP126 when driven by  
89 environmental changes. By 2100, the combined effect on unmanaged forest area is negative  
90 in CLASSIC-based simulations (-51.8 and -39.6 thousand km<sup>2</sup>), in contrast to the positive  
91 changes in VISIT-based simulations (503.1 to 916.3 thousand km<sup>2</sup>; Table S4). This is mainly  
92 due to the notable difference in the environmental effect between CLASSIC-based  
93 simulations and VISIT-based simulations. By 2100, the environmental change effect on  
94 unmanaged forest area is negative in CLASSIC (-160.9 and -159.6 thousand km<sup>2</sup>), in contrast  
95 to the positive changes simulated by VISIT (379.4 to 797.5 thousand km<sup>2</sup>; Table S4).

96 These differences are closely linked to the environmental change–induced forest  
97 carbon stock changes simulated by the two TBMs. For environmental change–induced forest  
98 carbon change, VISIT simulates an overall larger increase (or smaller decrease) in total forest  
99 carbon than CLASSIC, for both vegetation carbon stocks and soil carbon stocks (Figs. 1 and  
100 S4–S6). In CLASSIC simulations, total forest carbon under environmental changes can show  
101 a small net decrease, largely driven by declines in soil carbon that are only partly  
102 compensated by modest vegetation carbon gains. In contrast, VISIT generally produces net  
103 increases in both vegetation and soil carbon. These larger forest carbon gains in VISIT  
104 translate into correspondingly larger increases (and, in some cases, increases rather than

105 decreases) in natural land, especially unmanaged forest, under both Envir\_only and  
106 Envir\_Manage. Across all TBM simulations, managed forest consistently shows the largest  
107 relative decrease in area, providing the main source of land for natural land expansion.  
108

109 **Text S2. Mechanisms behind the interaction between environmental change and forest**  
110 **management on forest vegetation carbon stocks**

111 The contrasting direction of interaction effects between environmental change and  
112 forest management on forest vegetation carbon stock changes under SSP126 and SSP585  
113 (Fig. 1d,h) arises from two mechanisms: the direct impact of environmental changes on forest  
114 vegetation carbon stocks and the influence of carbon price. Environmental change generally  
115 increases forest vegetation carbon stocks under both SSP126 and SSP585. This increase tends  
116 to lower roundwood prices, substituting for human inputs that intensify forest management.  
117 At the same time, the presence of a carbon price can incentivize additional forest  
118 management regardless of whether environmental change occurs<sup>4-7</sup>. The net outcome of these  
119 mechanisms differs across the two scenarios. Under SSP126, a relatively high carbon price  
120 outweighs the moderate decrease in roundwood prices induced by environmental changes.  
121 This results in stronger incentives for investment in forest management, ultimately  
122 amplifying the forest vegetation carbon stock gains driven by forest management practices. In  
123 contrast, under SSP585, carbon prices are much lower, and the environmental change-  
124 induced decrease in roundwood price plays a dominant role. This price decrease reduces  
125 incentives for forest management investment and thus suppresses the forest vegetation carbon  
126 stock gains that would otherwise result from enhanced forest management. These interactions  
127 reflect a form of adaptation to environmental changes, driven by shifts in both forest  
128 management strategies and market responses.  
129

130 **Text S3. Mechanisms linking forest carbon stock changes to natural land expansion**

131 The relative increase in the natural land driven by forest carbon stocks increase, especially  
132 unmanaged forest and pasture, accompanied by a strong decrease in managed forest, can be  
133 attributed to several mechanisms: First, environmental- and management-induced changes in  
134 forest carbon stocks directly influence land allocation. Increases in forest vegetation carbon  
135 stocks raise forest yield, which lowers roundwood prices and reduces the profitability of  
136 managed forests, leading to their contraction. At the same time, higher total forest carbon  
137 stocks (both vegetation and soil carbon stocks), combined with carbon pricing under climate  
138 policy, increase the profitability of unmanaged forests by raising the monetary value of stored  
139 carbon and result in their expansion. Because carbon pricing values both vegetation and soil  
140 carbon stock, we explicitly consider changes in both in the study. Second, these changes alter  
141 the land competition with other land use types. In our cases, the land lost from managed  
142 forest is greater than the land gained by unmanaged forest, which reduces overall land  
143 competition and allows cropland, pasture, and other uses to expand. Compared with natural  
144 land types, managed land types face declining profitability due to greater land availability,  
145 which increases the supply of crops and fodder and further suppresses prices and profits. This  
146 results in a larger relative increase in unmanaged land than in managed land (among non-  
147 forest types) and also drives a greater increase in unmanaged forest area.

148

149 **Table S1.** Country to region mapping in GCAM.

| <b>GCAM regions</b>               | <b>Countries</b>                                                                                                                                                                                                                                                                                                                                                          |
|-----------------------------------|---------------------------------------------------------------------------------------------------------------------------------------------------------------------------------------------------------------------------------------------------------------------------------------------------------------------------------------------------------------------------|
| Africa_Eastern                    | Burundi, Comoros, Djibouti, Eritrea, Ethiopia, Kenya, Madagascar, Mauritius, Reunion, Rwanda, Sudan, Somalia, Uganda                                                                                                                                                                                                                                                      |
| Africa_Northern                   | Algeria, Egypt, Western Sahara, Libya, Morocco, Tunisia                                                                                                                                                                                                                                                                                                                   |
| Africa_Southern                   | Angola, Botswana, Lesotho, Mozambique, Malawi, Namibia, Swaziland, Tanzania, Zambia, Zimbabwe                                                                                                                                                                                                                                                                             |
| Africa_Western                    | Benin, Burkina Faso, Central African Republic, Cote d'Ivoire, Cameroon, Democratic Republic of the Congo, Congo, Cape Verde, Gabon, Ghana, Guinea, Gambia, Guinea-Bissau, Equatorial Guinea, Liberia, Mali, Mauritania, Niger, Nigeria, Senegal, Sierra Leone, Sao Tome and Principe, Chad, Togo                                                                          |
| Argentina                         | Argentina                                                                                                                                                                                                                                                                                                                                                                 |
| Australia_NZ                      | Australia, New Zealand                                                                                                                                                                                                                                                                                                                                                    |
| Brazil                            | Brazil                                                                                                                                                                                                                                                                                                                                                                    |
| Canada                            | Canada                                                                                                                                                                                                                                                                                                                                                                    |
| Central America and the Caribbean | Aruba, Anguilla, Netherlands Antilles, Antigua & Barbuda, Bahamas, Belize, Bermuda, Barbados, Costa Rica, Cuba, Cayman Islands, Dominica, Dominican Republic, Guadeloupe, Grenada, Guatemala, Honduras, Haiti, Jamaica, Saint Kitts and Nevis, Saint Lucia, Montserrat, Martinique, Nicaragua, Panama, El Salvador, Trinidad and Tobago, Saint Vincent and the Grenadines |
| Central Asia                      | Armenia, Azerbaijan, Georgia, Kazakhstan, Kyrgyzstan, Mongolia, Tajikistan, Turkmenistan, Uzbekistan                                                                                                                                                                                                                                                                      |
| China                             | China                                                                                                                                                                                                                                                                                                                                                                     |
| Colombia                          | Colombia                                                                                                                                                                                                                                                                                                                                                                  |
| EU-12                             | Bulgaria, Cyprus, Czech Republic, Estonia, Hungary, Lithuania, Latvia, Malta, Poland, Romania, Slovakia, Slovenia                                                                                                                                                                                                                                                         |
| EU-15                             | Andorra, Austria, Belgium, Denmark, Finland, France, Germany, Greece, Greenland, Ireland, Italy, Luxembourg, Monaco, Netherlands, Portugal, Sweden, Spain, United Kingdom                                                                                                                                                                                                 |
| Europe_Eastern                    | Belarus, Moldova, Ukraine                                                                                                                                                                                                                                                                                                                                                 |
| European Free Trade Association   | Iceland, Norway, Switzerland                                                                                                                                                                                                                                                                                                                                              |
| Europe_Non_EU                     | Albania, Bosnia and Herzegovina, Croatia, Macedonia, Montenegro, Serbia, Turkey                                                                                                                                                                                                                                                                                           |
| India                             | India                                                                                                                                                                                                                                                                                                                                                                     |
| Indonesia                         | Indonesia                                                                                                                                                                                                                                                                                                                                                                 |
| Japan                             | Japan                                                                                                                                                                                                                                                                                                                                                                     |
| Mexico                            | Mexico                                                                                                                                                                                                                                                                                                                                                                    |
| Middle East                       | United Arab Emirates, Bahrain, Iran, Iraq, Israel, Jordan, Kuwait, Lebanon, Oman, Palestine, Qatar, Saudi Arabia, Syria, Yemen                                                                                                                                                                                                                                            |
| Pakistan                          | Pakistan                                                                                                                                                                                                                                                                                                                                                                  |
| Russia                            | Russia                                                                                                                                                                                                                                                                                                                                                                    |

|                        |                                                                                                                                                                                                                                                                                                                                                                                                                                                                                                                                                                                   |
|------------------------|-----------------------------------------------------------------------------------------------------------------------------------------------------------------------------------------------------------------------------------------------------------------------------------------------------------------------------------------------------------------------------------------------------------------------------------------------------------------------------------------------------------------------------------------------------------------------------------|
| South Africa           | South Africa                                                                                                                                                                                                                                                                                                                                                                                                                                                                                                                                                                      |
| South America_Northern | French Guiana, Guyana, Suriname, Venezuela                                                                                                                                                                                                                                                                                                                                                                                                                                                                                                                                        |
| South America_Southern | Bolivia, Chile, Ecuador, Peru, Paraguay, Uruguay                                                                                                                                                                                                                                                                                                                                                                                                                                                                                                                                  |
| South Asia             | Afghanistan, Bangladesh, Bhutan, Sri Lanka, Maldives, Nepal                                                                                                                                                                                                                                                                                                                                                                                                                                                                                                                       |
| Southeast Asia         | American Samoa, Brunei Darussalam, Cocos (Keeling) Islands, Cook Islands, Christmas Island, Fiji, Federated States of Micronesia, Guam, Cambodia, Kiribati, Lao Peoples Democratic Republic, Marshall Islands, Myanmar, Northern Mariana Islands, Malaysia, Mayotte, New Caledonia, Norfolk Island, Niue, Nauru, Pacific Islands Trust Territory, Pitcairn Islands, Philippines, Palau, Papua New Guinea, Democratic Peoples Republic of Korea, French Polynesia, Singapore, Solomon Islands, Seychelles, Thailand, Tokelau, Timor Leste, Tonga, Tuvalu, Viet Nam, Vanuatu, Samoa |
| South Korea            | South Korea                                                                                                                                                                                                                                                                                                                                                                                                                                                                                                                                                                       |
| USA                    | United States                                                                                                                                                                                                                                                                                                                                                                                                                                                                                                                                                                     |

151 **Table S2.** Land use area change difference by driver and scenario. Values are shown as mean  
 152  $\pm$  standard deviation across VISIT simulations driven by five different Earth System Model  
 153 (ESM) climate forcings. Changes are reported as both relative differences (%) and absolute  
 154 differences (thousand km<sup>2</sup>) for combined, environmental, management, and interaction  
 155 effects. Note that Grass and Shrubs are both natural land, and there is no managed Grass or  
 156 Shrubs category in GCAM.

157

| Scenarios  | Land use types     | Combined effect     |                     | Environmental change effect |                     | Forest management change effect |                     | Interaction effect  |                     |
|------------|--------------------|---------------------|---------------------|-----------------------------|---------------------|---------------------------------|---------------------|---------------------|---------------------|
|            |                    | Relative difference | Absolute difference | Relative difference         | Absolute difference | Relative difference             | Absolute difference | Relative difference | Absolute difference |
| SSP1<br>26 | Managed forest     | -10.6%±0.7%         | -1043.3±65.2        | -6.1%±0.5%                  | -602.4±52.3         | -3.1%±0.1%                      | -309.5±12.2         | -1.3%±0.4%          | -131.4±38.5         |
|            | Unmanaged forest   | 2.9%±0.6%           | 704.3±153.8         | 2.4%±0.7%                   | 582.3±155.3         | 0.5%±0.0%                       | 109.6±4.1           | 0.1%±0.0%           | 12.4±10.7           |
|            | Managed pasture    | -0.2%±0.1%          | -10.7±7.6           | -0.3%±0.1%                  | -13.3±7.0           | 0.0%±0.0%                       | 1.9±0.9             | 0.0%±0.0%           | 0.7±0.8             |
|            | Unmanaged pasture  | 1.0%±0.3%           | 249.5±71.0          | 0.3%±0.3%                   | 83.6±66.0           | 0.3%±0.0%                       | 88.4±4.4            | 0.3%±0.1%           | 77.5±15.5           |
|            | Cropland           | 0.3%±0.2%           | 36.3±22.1           | 0.1%±0.2%                   | 15.2±21.7           | 0.2%±0.0%                       | 22.2±0.6            | 0.0%±0.0%           | -1.2±2.5            |
|            | Bioenergy          | -0.1%±0.1%          | -2.5±2.4            | -0.3%±0.1%                  | -7.6±2.3            | 0.0%±0.0%                       | 1.3±0.2             | 0.1%±0.0%           | 3.8±1.2             |
|            | Grass              | 0.3%±0.5%           | 59.3±99.6           | -0.2%±0.5%                  | -29.8±98.1          | 0.3%±0.0%                       | 58.8±2.0            | 0.2%±0.0%           | 30.4±6.9            |
|            | Shrubs             | 0.1%±0.2%           | 7.0±17.8            | -0.2%±0.2%                  | -28.0±18.0          | 0.2%±0.0%                       | 27.3±1.7            | 0.1%±0.0%           | 7.7±3.1             |
|            | Others             | 0.0%±0.0%           | 0.0±0.0             | 0.0%±0.0%                   | 0.0±0.0             | 0.0%±0.0%                       | 0.0±0.0             | 0.0%±0.0%           | 0.0±0.0             |
|            | Total natural land | 4.1%±0.4%           | 1009.5±51.5         | 2.1%±0.4%                   | 594.8±36.4          | 1.4%±0.1%                       | 285.9±11.4          | 0.6%±0.2%           | 128.7±35.6          |
| SSP5<br>85 | Managed forest     | -27.1%±1.7%         | -2935.0±182.7       | -25.2%±1.9%                 | -2723.5±206.7       | -4.2%±0.1%                      | -457.9±6.6          | 2.3%±0.2%           | 246.5±25.9          |
|            | Unmanaged forest   | 5.0%±0.3%           | 1039.7±69.2         | 4.5%±0.4%                   | 939.2±80.7          | 0.9%±0.0%                       | 196.5±4.5           | -0.5%±0.1%          | -96.1±11.7          |
|            | Managed pasture    | -1.0%±0.0%          | -104.9±5.0          | -0.9%±0.0%                  | -101.8±4.8          | -0.1%±0.0%                      | -9.4±1.1            | 0.1%±0.0%           | 6.3±0.9             |
|            | Unmanaged pasture  | 4.3%±0.2%           | 979.9±53.2          | 4.1%±0.3%                   | 933.8±57.9          | 0.5%±0.0%                       | 116.8±1.8           | -0.3%±0.0%          | -70.8±5.9           |
|            | Cropland           | 1.5%±0.1%           | 210.4±11.4          | 1.4%±0.1%                   | 199.8±12.4          | 0.2%±0.0%                       | 27.9±0.6            | -0.1%±0.0%          | -17.3±1.7           |
|            | Bioenergy          | 2.8%±0.4%           | 56.6±8.7            | 2.8%±0.4%                   | 56.4±8.5            | 0.2%±0.0%                       | 3.2±0.2             | -0.2%±0.0%          | -3.0±0.2            |
|            | Grass              | 3.1%±0.2%           | 547.0±41.8          | 2.9%±0.3%                   | 506.9±46.5          | 0.5%±0.0%                       | 87.4±0.8            | -0.3%±0.0%          | -47.3±4.7           |
|            | Shrubs             | 1.9%±0.2%           | 206.2±19.8          | 1.7%±0.2%                   | 189.1±22.1          | 0.3%±0.0%                       | 35.5±0.5            | -0.2%±0.0%          | -18.3±2.1           |
|            | Others             | 0.0%±0.0%           | 0.0±0.0             | 0.0%±0.0%                   | 0.0±0.0             | 0.0%±0.0%                       | 0.0±0.0             | 0.0%±0.0%           | 0.0±0.0             |
|            | Total natural land | 13.4%±0.9%          | 2667.9±178.1        | 12.3%±1.1%                  | 2467.2±201.1        | 2.2%±0.0%                       | 426.8±7.0           | 1.2%±0.1%           | 226.1±24.3          |

158

159 **Table S3.** Natural land area change (thousand km<sup>2</sup>) by TMB simulation and driver. Results  
160 are disaggregated by natural land type (unmanaged forest, unmanaged pasture, grass, shrub),  
161 TBM–ESM combination, scenario (SSP126, SSP585), and effect (combined, environmental,  
162 management, interaction).

| Natural land types    | TBM simulations   | SSP126       |                   |                |                 | SSP585       |                   |                |                 |
|-----------------------|-------------------|--------------|-------------------|----------------|-----------------|--------------|-------------------|----------------|-----------------|
|                       |                   | Combine<br>d | Environment<br>al | Managemen<br>t | Interactio<br>n | Combine<br>d | Environment<br>al | Managemen<br>t | Interactio<br>n |
| Unmanage<br>d forest  | CLASSIC_GFDL      | -39.6        | -160.9            | 112.5          | 8.8             | 900.1        | 769.2             | 205.1          | -74.3           |
|                       | CLASSIC_UKES<br>M | -51.8        | -159.6            | 105.8          | 2.1             | 1231.3       | 1115.7            | 197.4          | -81.9           |
|                       | VISIT_GFDL        | 763.1        | 632.2             | 106.3          | 24.7            | 1021.7       | 912.6             | 194.8          | -85.7           |
|                       | VISIT_UKESM       | 503.1        | 379.4             | 104.3          | 19.4            | 954.2        | 839.0             | 199.4          | -84.2           |
|                       | VISIT_IPSL        | 628.8        | 503.3             | 111.1          | 14.4            | 1002.8       | 901.1             | 200.1          | -98.5           |
|                       | VISIT_MPI         | 916.3        | 797.5             | 113.9          | 5.0             | 1097.0       | 1011.2            | 198.8          | -113.1          |
|                       | VISIT_MRI         | 710.2        | 599.2             | 112.5          | -1.5            | 1122.7       | 1032.2            | 189.4          | -99.0           |
| Unmanage<br>d pasture | CLASSIC_GFDL      | 332.5        | 199.4             | 89.5           | 43.6            | 793.8        | 727.7             | 122.5          | -56.4           |
|                       | CLASSIC_UKES<br>M | 432.4        | 300.5             | 88.8           | 43.0            | 1030.1       | 965.1             | 122.3          | -57.3           |
|                       | VISIT_GFDL        | 267.3        | 85.3              | 82.6           | 99.4            | 989.9        | 939.0             | 115.4          | -64.6           |
|                       | VISIT_UKESM       | 345.7        | 182.2             | 86.1           | 77.5            | 935.1        | 882.2             | 118.8          | -65.9           |
|                       | VISIT_IPSL        | 262.6        | 89.2              | 88.5           | 84.9            | 915.5        | 868.1             | 117.5          | -70.1           |
|                       | VISIT_MPI         | 151.7        | -1.3              | 90.7           | 62.3            | 1021.3       | 982.0             | 118.1          | -78.8           |
|                       | VISIT_MRI         | 220.4        | 62.8              | 94.1           | 63.5            | 1037.7       | 997.7             | 114.4          | -74.4           |
| Grass                 | CLASSIC_GFDL      | 190.2        | 111.2             | 58.9           | 20.1            | 456.4        | 403.9             | 91.7           | -39.2           |
|                       | CLASSIC_UKES<br>M | 317.0        | 239.0             | 58.2           | 19.8            | 653.7        | 604.6             | 89.6           | -40.5           |
|                       | VISIT_GFDL        | 35.4         | -61.4             | 57.3           | 39.5            | 531.2        | 486.1             | 87.7           | -42.7           |
|                       | VISIT_UKESM       | 181.5        | 93.3              | 56.7           | 31.6            | 499.4        | 454.5             | 88.6           | -43.6           |
|                       | VISIT_IPSL        | 118.5        | 26.3              | 58.3           | 33.9            | 524.4        | 483.3             | 86.7           | -45.6           |
|                       | VISIT_MPI         | -83.8        | -167.9            | 60.5           | 23.6            | 578.8        | 544.9             | 87.0           | -53.1           |
|                       | VISIT_MRI         | 44.9         | -39.6             | 61.1           | 23.3            | 601.5        | 565.9             | 86.9           | -51.4           |
| Shrubs                | CLASSIC_GFDL      | 54.9         | 21.0              | 29.8           | 4.1             | 182.0        | 159.3             | 37.5           | -14.8           |
|                       | CLASSIC_UKES<br>M | 91.5         | 57.9              | 26.5           | 7.1             | 244.8        | 224.6             | 36.0           | -15.7           |
|                       | VISIT_GFDL        | 6.5          | -31.1             | 26.3           | 11.3            | 196.7        | 177.9             | 35.5           | -16.6           |
|                       | VISIT_UKESM       | 37.0         | 2.7               | 25.3           | 9.0             | 184.0        | 164.0             | 36.3           | -16.4           |
|                       | VISIT_IPSL        | -1.0         | -37.7             | 27.3           | 9.4             | 196.6        | 179.2             | 35.1           | -17.7           |
|                       | VISIT_MPI         | -9.8         | -43.5             | 29.8           | 4.0             | 222.6        | 208.2             | 35.3           | -20.9           |
|                       | VISIT_MRI         | 2.4          | -30.4             | 27.7           | 5.0             | 231.2        | 216.2             | 35.2           | -20.1           |

163

164

165

166 **Table S4.** Plant functional type harmonization between TBMs and GCAM.

| <b>CLASSIC land types</b>                                                                                                                       | <b>Harmonization of land types Between CLASSIC and GCAM</b> | <b>GCAM land types</b>                                                                                                                                                                                                                    | <b>Harmonization of land types between VISIT and GCAM</b> | <b>VISIT land type</b>                                                                                                                                                                                                                                                                            |
|-------------------------------------------------------------------------------------------------------------------------------------------------|-------------------------------------------------------------|-------------------------------------------------------------------------------------------------------------------------------------------------------------------------------------------------------------------------------------------|-----------------------------------------------------------|---------------------------------------------------------------------------------------------------------------------------------------------------------------------------------------------------------------------------------------------------------------------------------------------------|
| C3crop                                                                                                                                          | C3crop                                                      | FiberCrop, FodderHerb, FruitsTree, Fruits, Legumes, MiscCropTree, MiscCrop, NutsSeedsTree, NutsSeeds, OilCropTree, OilCrop, OilPalmTree, OtherArableLand, OtherGrain, Rice, RootTuber, Soybean, Vegetables, Wheat, biomassTree, SugarCrop | Crop                                                      | Crop                                                                                                                                                                                                                                                                                              |
| C4crop                                                                                                                                          | C4crop                                                      | biomassGrass, OtherGrainC4, CornC4, SugarCropC4, FodderHerbC4                                                                                                                                                                             |                                                           |                                                                                                                                                                                                                                                                                                   |
| Grass                                                                                                                                           | Pasture                                                     | Pasture, ProtectedUnmanagedPasture, UnmanagedPasture,                                                                                                                                                                                     | Grass                                                     | tibetan meadow & siberian highland, warm or hot wetlands, cool bog & mire, shore & hinterland, second growth field, second growth woods, succulent & thorn wood, tropical savanna, woodland                                                                                                       |
|                                                                                                                                                 | Grass                                                       | FodderGrass, Grassland, ProtectedGrassland                                                                                                                                                                                                |                                                           |                                                                                                                                                                                                                                                                                                   |
|                                                                                                                                                 | Shrubland                                                   | ProtectedShrubland, Shrubland                                                                                                                                                                                                             | Shrub                                                     | mediterranean-type dry wood, cool semi-desert scrub                                                                                                                                                                                                                                               |
| Needleleaf evergreen tree, Needleleaf deciduous tree, Broadleaf evergreen tree, Broadleaf cold deciduous tree, Broadleaf drought deciduous tree | Forest                                                      | Forest                                                                                                                                                                                                                                    | Forest                                                    | tropical montane Forest, tropical & subtropical dry Forest, mid-latitude mixed Forest, mid-latitude broad-leaved Forest, semiarid wood or low Forest, coniferous evergreen Forest, southern taiga, main evergreen taiga, main deciduous taiga, northern evergreen taiga, northern deciduous taiga |

167

168

169

170

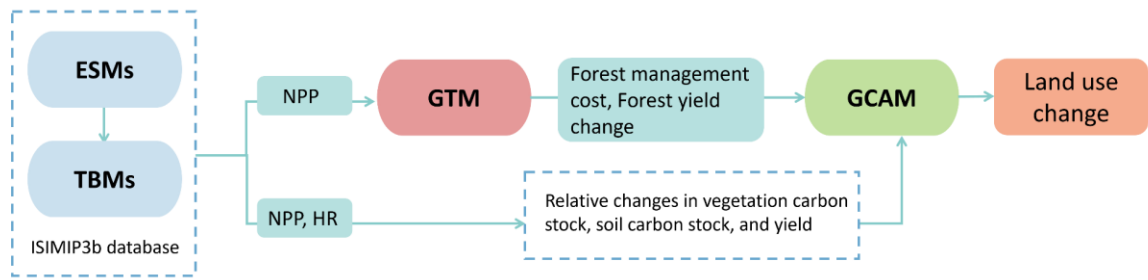

171

172

173

174

175

176

177

178

179

180

181

182

183

184

185

**Fig. S1.** Flowchart of the full coupling framework applied in the study, corresponding to the Envir\_Manage experiment. Outputs from Earth System Models (ESMs) and Terrestrial Biosphere Models (TBMs) in the ISIMIP3b database provide net primary productivity (NPP) and heterotrophic respiration (HR) to represent the impacts of environmental change on vegetation and soil carbon. Forest yield and management cost responses are simulated using GTM, with woody biomass inputs derived from GCAM. Relative changes in vegetation carbon stock, soil carbon stock, and yields of all vegetation types are then incorporated into GCAM to project land use change. Note that in the Baseline experiment, only relative changes in vegetation carbon stocks, soil carbon stocks, and yields of non-forest vegetation are incorporated into GCAM. Additionally, a consistent carbon price is applied in both GTM and GCAM to ensure scenario consistency. This framework represents the fully coupled configuration among ESMs, TBMs, GTM, and GCAM. Other experiments use reduced or partial couplings (see Methods for details).

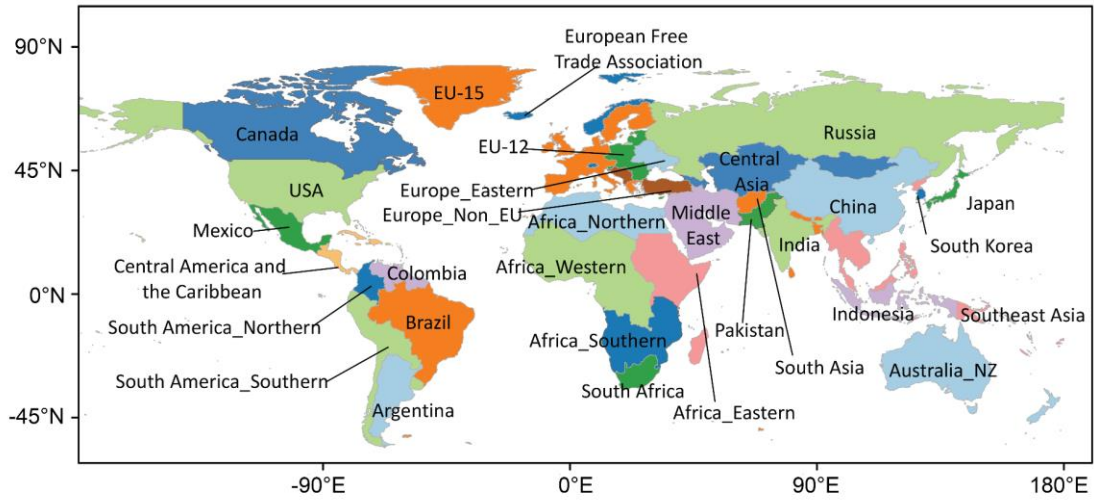

186

187

188

189

190

**Fig. S2.** Spatial distribution of GCAM regions, adapted from Calvin et al. (2019). Distinct colours are used to distinguish adjacent regions. Map lines delineate study areas and do not necessarily represent accepted national boundaries.

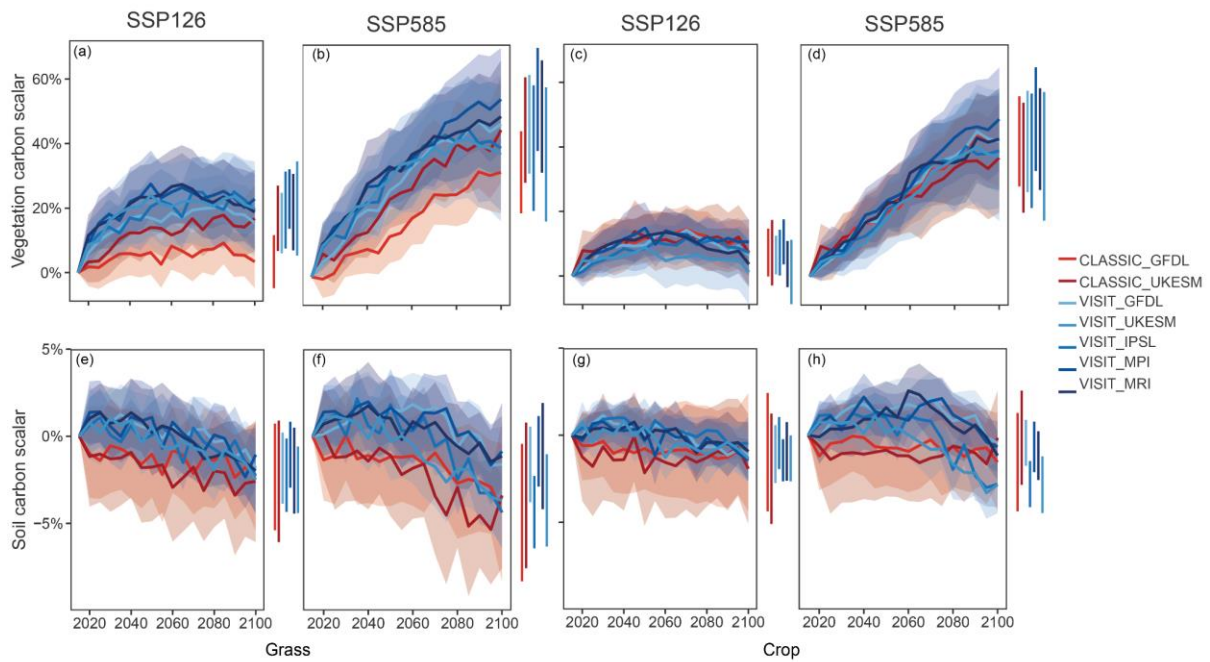

192

193 **Fig. S3.** Relative change in vegetation and soil carbon stocks for grass and crop from 2015–  
 194 2100. Panels (a,b,e,f) show grass; panels (c,d,g,h) show crop. Left panels show SSP126; right  
 195 panels show SSP585. Grass and crop categories follow the harmonized PFT-to-GCAM  
 196 classification in Table S4. Shaded areas indicate spatial variability (standard deviation) across  
 197 GCAM regions. Error bars represent spatial variability across GCAM regions, calculated  
 198 from the 2098–2100 mean. Because 2100 is the final model year, this period constitutes the  
 199 only available centered moving-average window for 2100 at a 5-year time step (see  
 200 Methods).

201

202

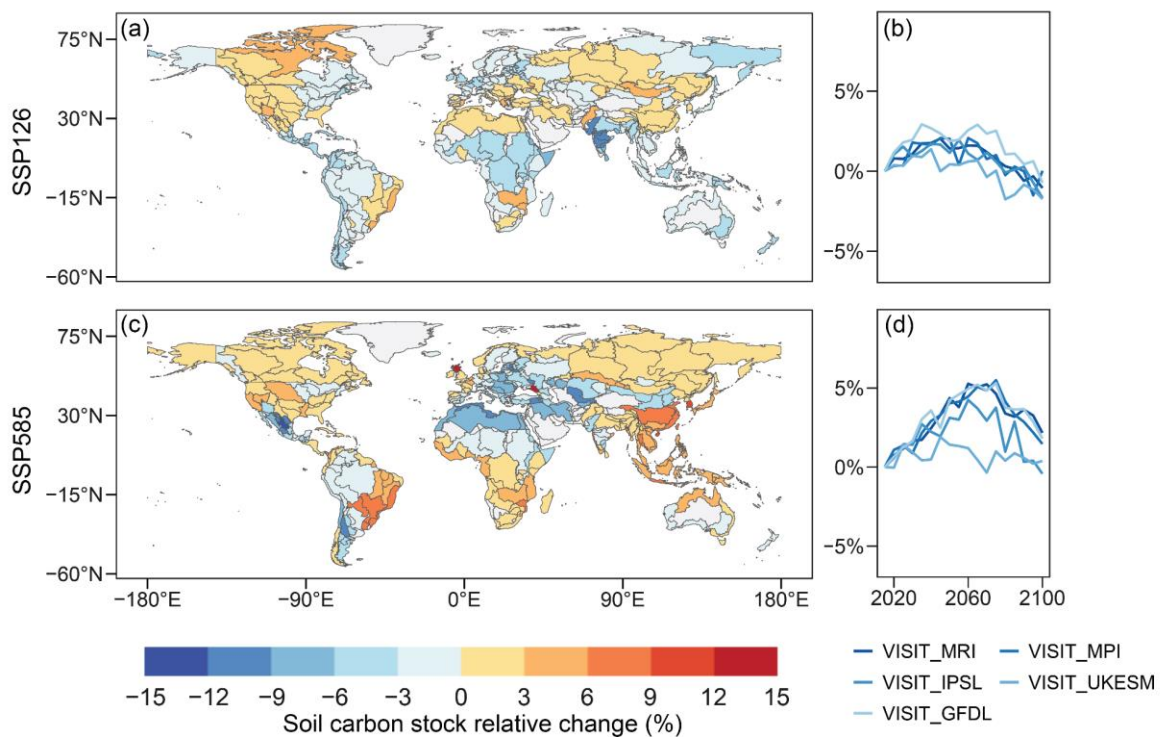

203

204 **Fig. S4.** Forest soil carbon scalar change from 2015–2100. Panels (a,c) show spatial patterns;  
 205 panels (b,d) show temporal trends. Top row: SSP126; bottom row: SSP585. Line colours  
 206 represent VISIT simulations driven by different ESM climate forcings. Solid lines show  
 207 global area-weighted means.

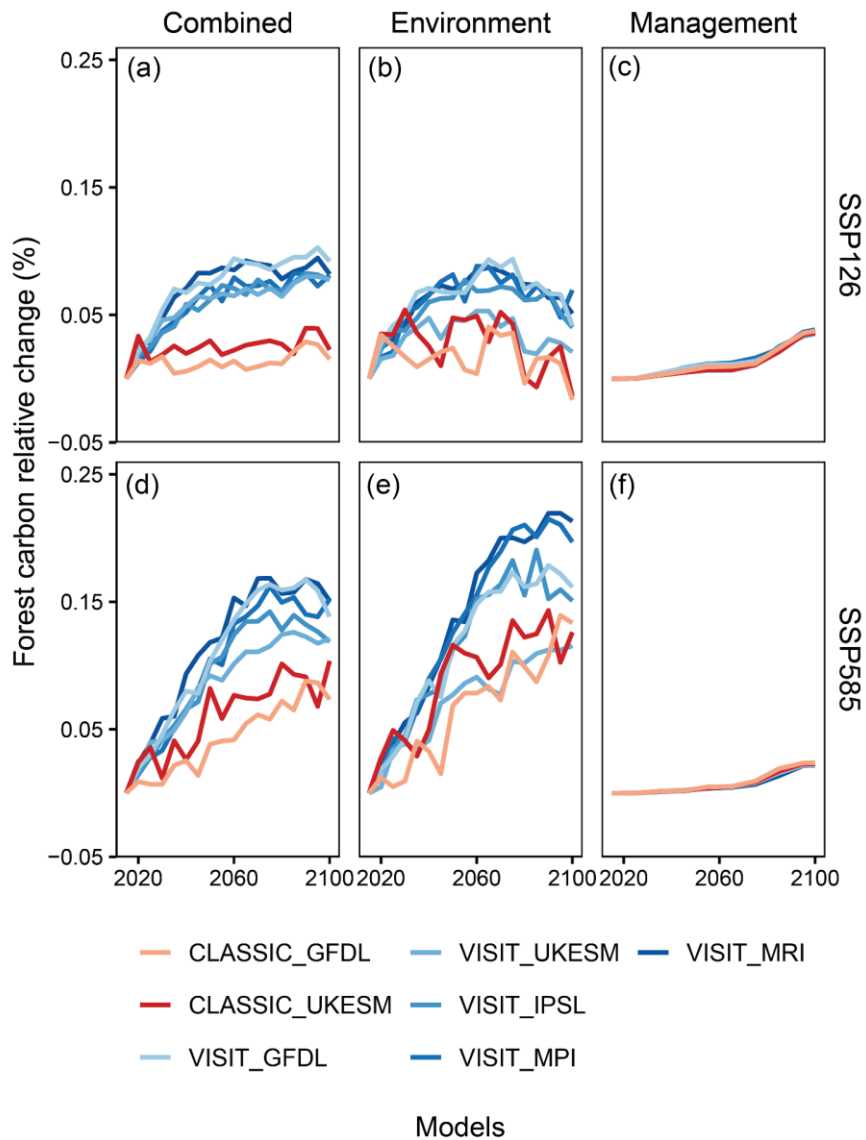

208

209 **Fig. S5.** Total forest carbon stock changes (vegetation + soil) under different TBM–ESM  
 210 combinations from 2015–2100. Panels show (a,d) the combined effect, (b,e) the  
 211 environmental change effect, and (c,f) the management change effect under SSP126 (top) and  
 212 SSP585 (bottom). Line colours represent different TBM–ESM combinations. For combined  
 213 and environmental effects, values are forest area-weighted global means; for management  
 214 effect, values are managed forest area-weighted global means.

215

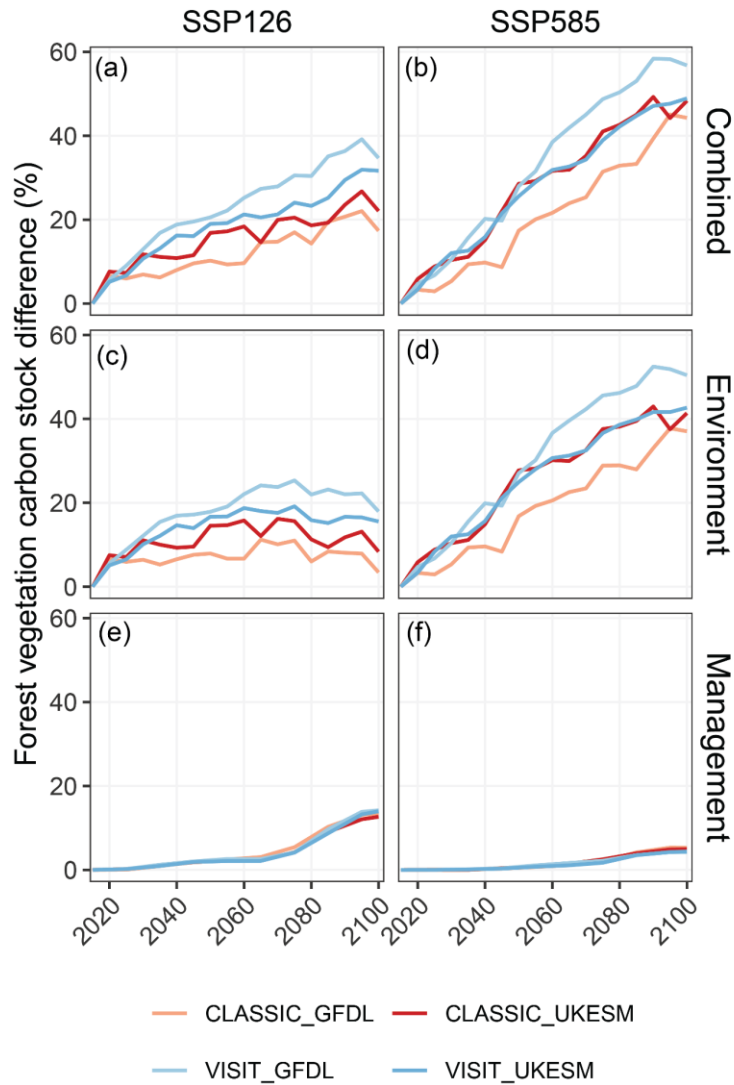

216

217 **Fig. S6.** Forest vegetation carbon stock changes comparing VISIT and CLASSIC from 2015–  
 218 2010. Red represents CLASSIC simulations; blue represents VISIT simulations. Lighter  
 219 colours indicate GFDL forcing; and darker colours indicate UKESM forcing. Panels show  
 220 (a,b) the combined effect, (c,d) the environmental change effect, and (e,f) the management  
 221 change effect under SSP126 (left) and SSP585 (right).

222

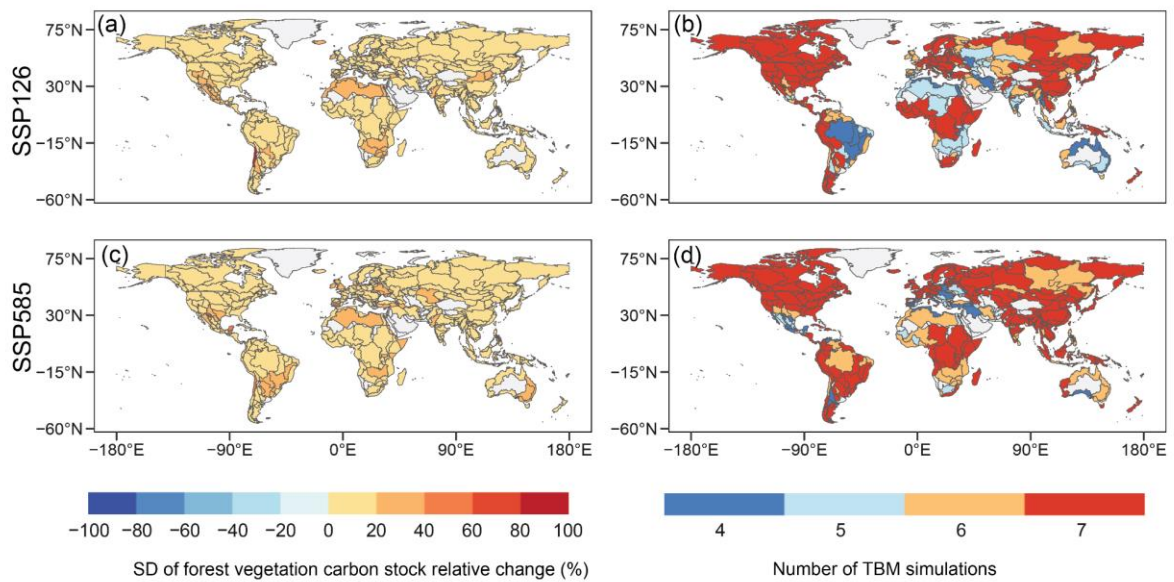

223

224 **Fig. S7.** Consistency and variability of forest carbon changes across TBMs. Panels (a,c) show  
 225 the standard deviation of forest carbon changes (using VISIT simulations only), and panels  
 226 (b,d) show directional consistency across all TBM simulation experiments, for changes  
 227 driven by the combined effects of environmental change and forest management. Standard  
 228 deviations are shown only for VISIT because the main-text results are based on ensemble  
 229 means from VISIT simulations driven by five ESM climate forcings (and the corresponding  
 230 VISIT-driven GTM and GCAM outputs). In contrast, consistency in the direction of change  
 231 is evaluated across both TBMs (VISIT and CLASSIC) to assess sensitivity to TBM-related  
 232 uncertainty.

233

234

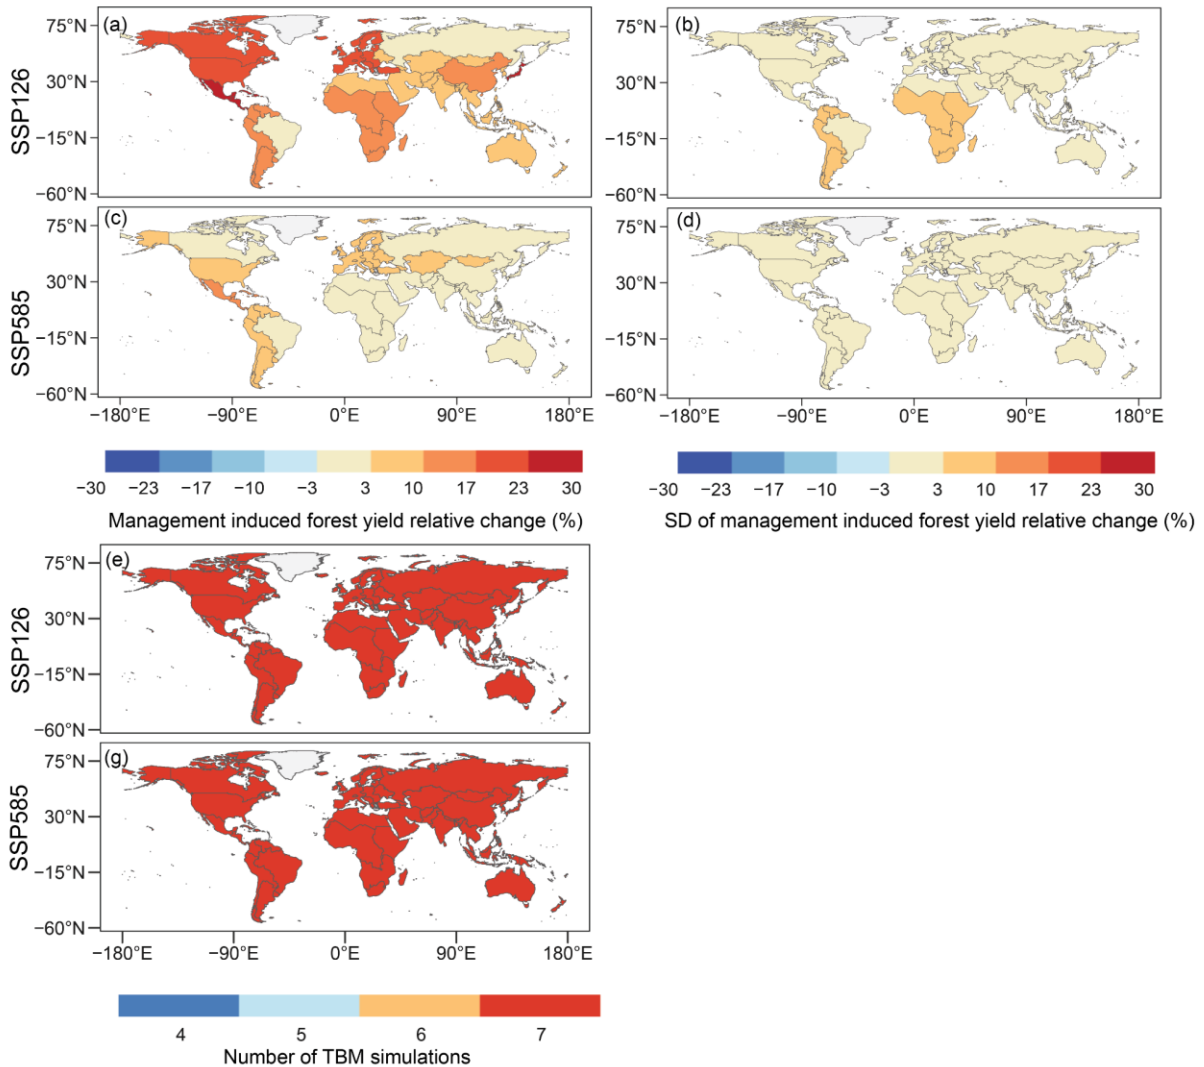

235

236 **Fig. S8.** Management-induced forest yield change under Enviro\_Manage, 2015- 2100. Panels  
 237 (a,c) show mean yield change across TBM simulations. Panels (b,d) standard deviation across  
 238 VISIT simulations. Panels (e,g) show directional consistency across all seven TBM  
 239 simulations under Enviro\_Manage. Top row: SSP126; bottom row: SSP585. Standard  
 240 deviation is calculated from VISIT simulations only, as main text results are based on VISIT  
 241 ensemble means; directional consistency is evaluated across both VISIT and CLASSIC to  
 242 assess robustness to TBM structural uncertainty.

243

244

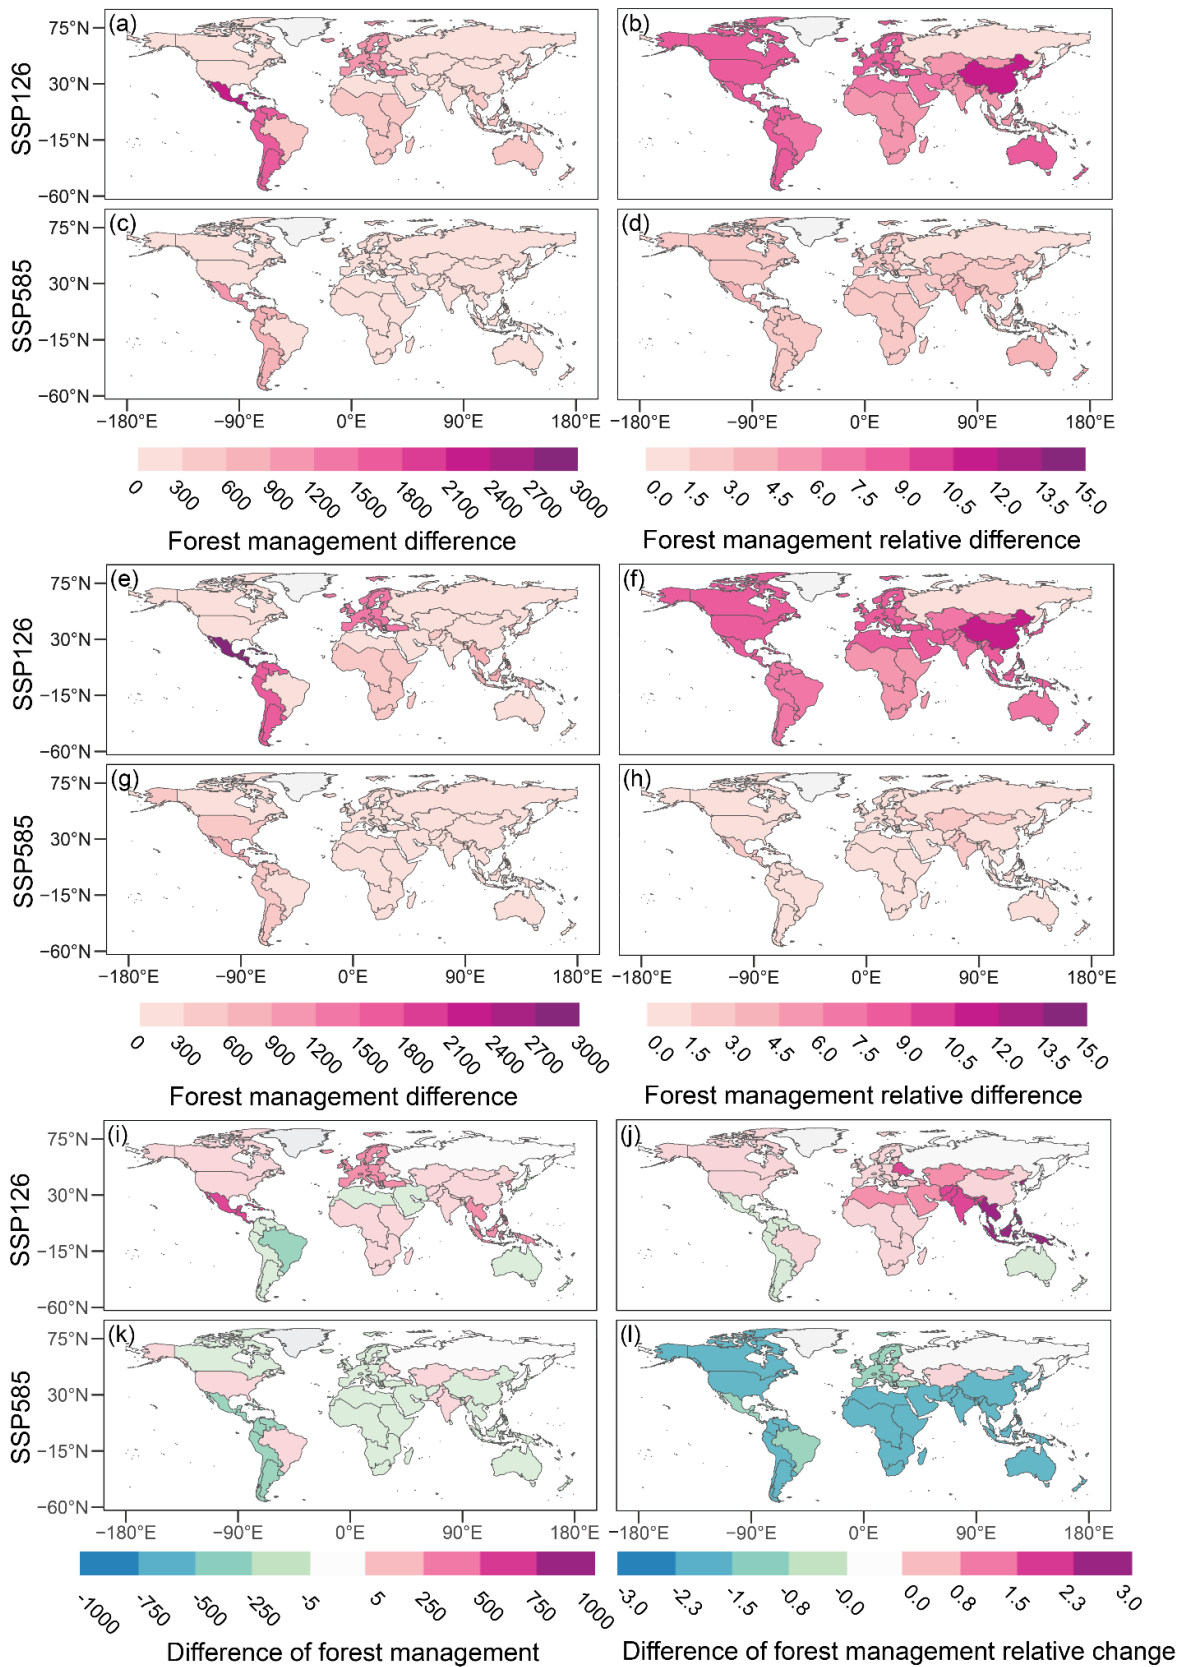

245

246

247

248

249

**Fig. S9.** Changes in forest management intensity for managed forests at mature age using VISIT-driven GTM simulations. Panels (a–d) show changes in forest management intensity from 2015 to 2100 under the *Manage\_only* case, with absolute differences in panels (a,c) and relative differences in panels (b,d). Panels (e–h) show the corresponding changes under the

250 *Envir\_Manage* case, with absolute differences in panels (e,g) and relative differences in  
251 panels (f,h). Panels (i-l) show the differences in forest management intensity between  
252 *Envir\_Manage* and *Manage\_only* by 2100 (i.e., panels e-h minus panels a-d), with absolute  
253 differences in panels (i,k) and relative differences in panels (j,l).

254

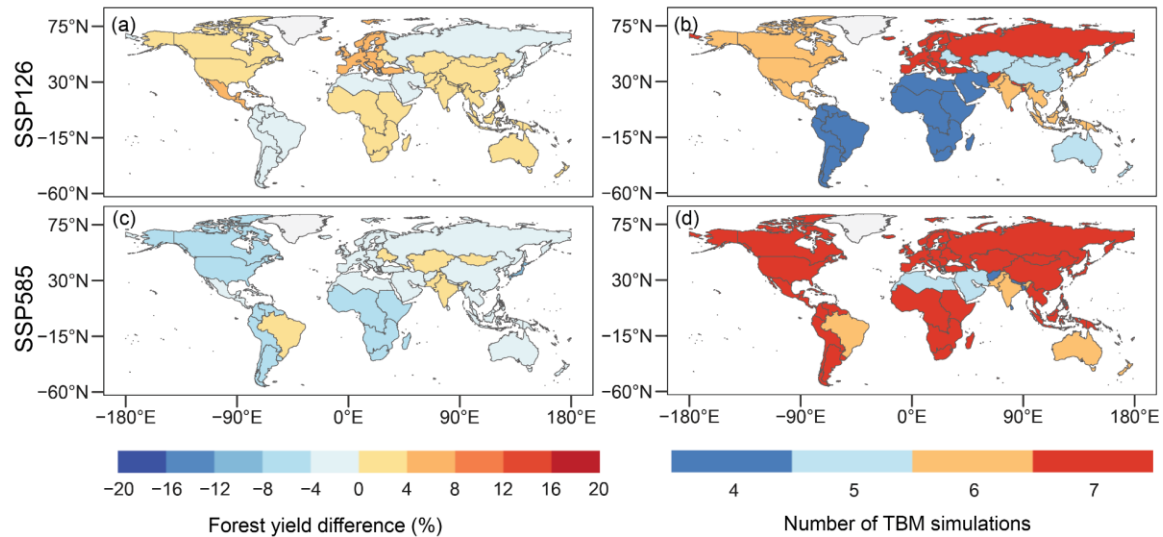

255

256 **Fig. S10.** Effects of environmental change on forest management outcomes across TBMs.

257 Panels (a,b) show differences in mean values between scenarios with and without  
 258 environmental change (i.e., *Envir\_Manage* versus *Manage\_only*) using different TBM  
 259 simulations as inputs. Panels (c,d) show consistency in the direction of forest yield changes  
 260 induced by forest management, comparing scenarios with and without environmental change  
 261 across experiments using all seven TBM simulations under *Envir\_Manage*. Standard  
 262 deviations are shown only for VISIT, as the main-text results are based on ensemble means  
 263 from VISIT simulations driven by five ESM climate forcings (and corresponding VISIT-  
 264 driven GTM and GCAM outputs). Consistency in the direction of change is evaluated across  
 265 both TBMs (VISIT and CLASSIC) to assess robustness to TBM-related uncertainty.

266

267

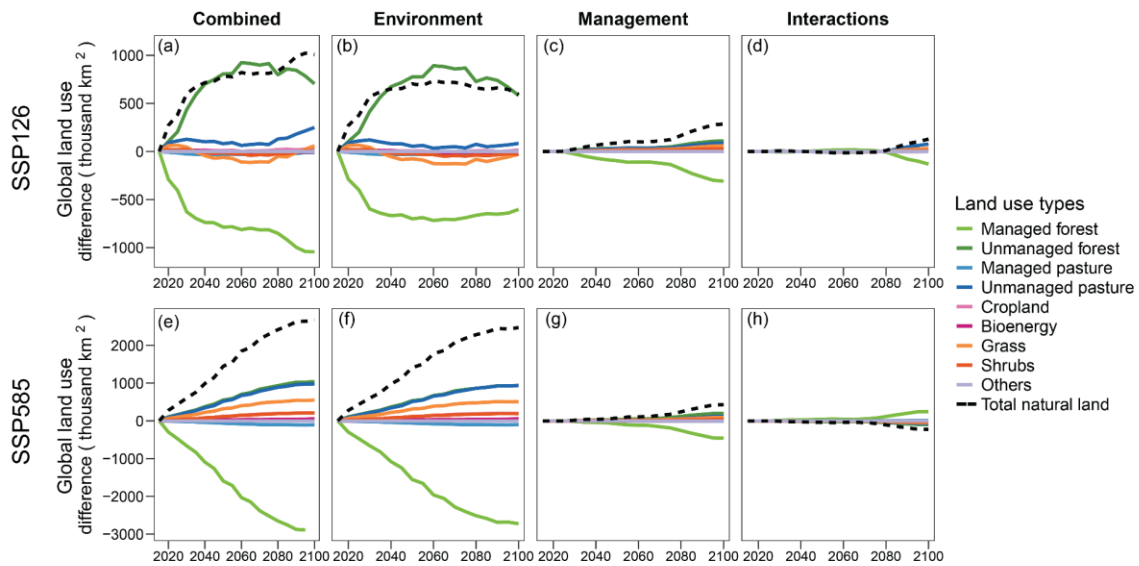

268

269 **Fig. S11.** Land use change differences induced by forest carbon changes driven by (a,e) the  
 270 combined effects of environmental change and forest management, (b,f) environmental  
 271 change alone, (c,g) forest management alone, and (d,h) the interaction between  
 272 environmental change and forest management. Results are based on the mean values across  
 273 simulations using different VISIT-driven GCAM simulations under (a–d) SSP126 and (e–h)  
 274 SSP585.

275

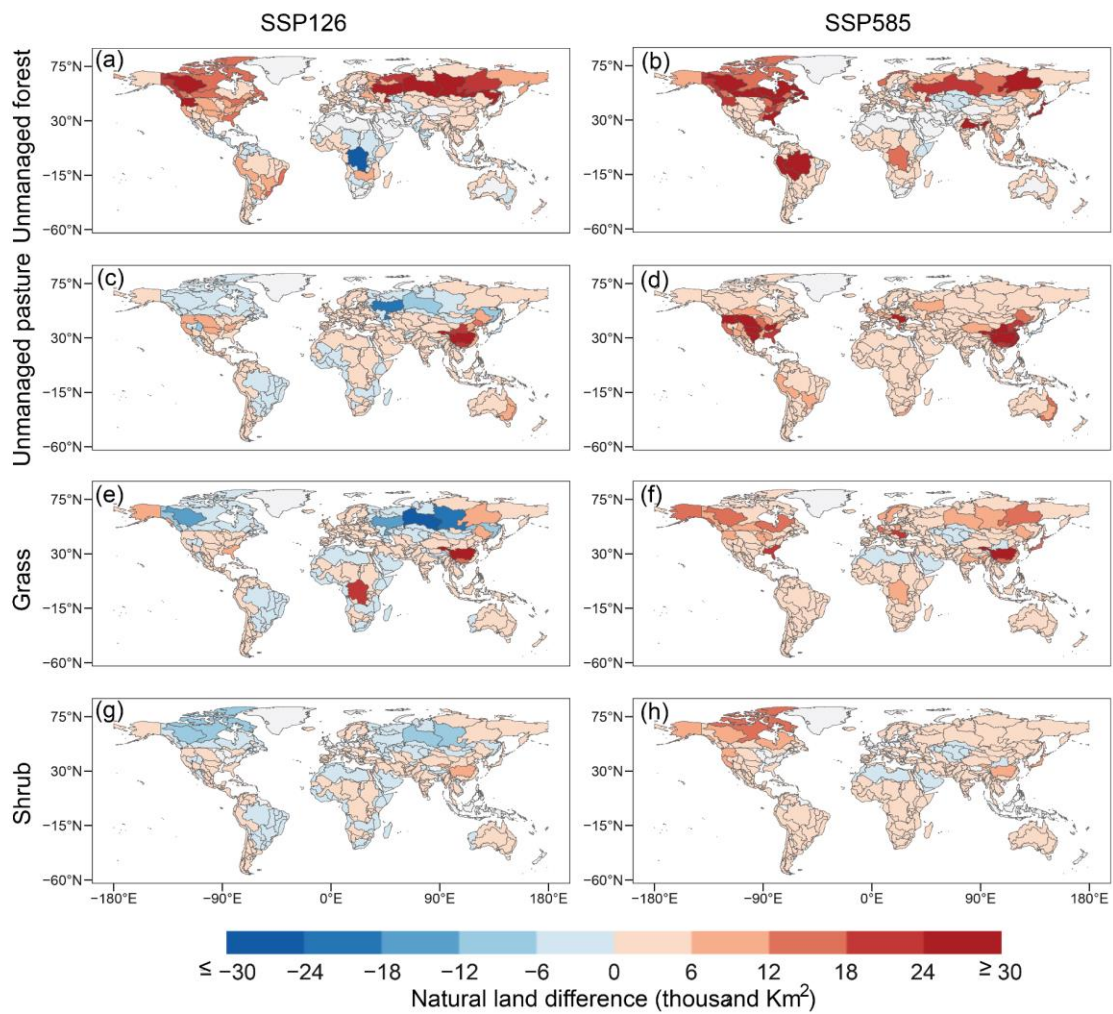

276

277 **Fig. S12.** Changes in natural land by detailed natural land use type driven by the combined  
 278 effects of environmental change and forest management in 2100 under SSP126 and SSP585.  
 279 Results are based on mean values across different VISIT-driven GCAM simulations, with  
 280 panels (a,c,e,g) showing SSP126 and panels (b,d,f,h) showing SSP585.

281

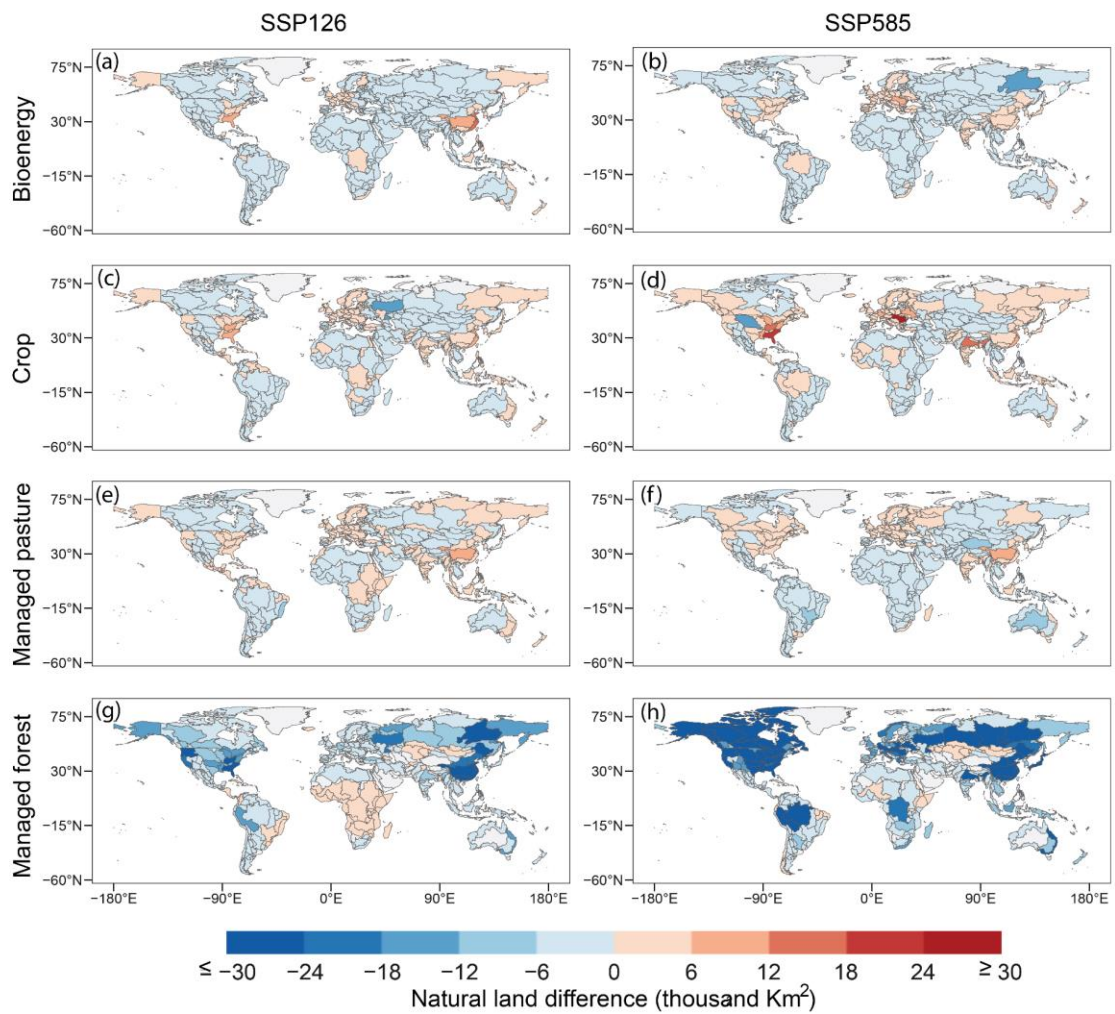

282

283 **Fig. S13.** Changes in managed land by detailed managed land use type driven by the  
 284 combined effects of environmental change and forest management in 2100 under SSP126 and  
 285 SSP585. Results are based on mean values across different VISIT-driven GCAM simulations,  
 286 with panels (a,c,e,g) showing SSP126 and panels (b,d,f,h) showing SSP585.

287

288

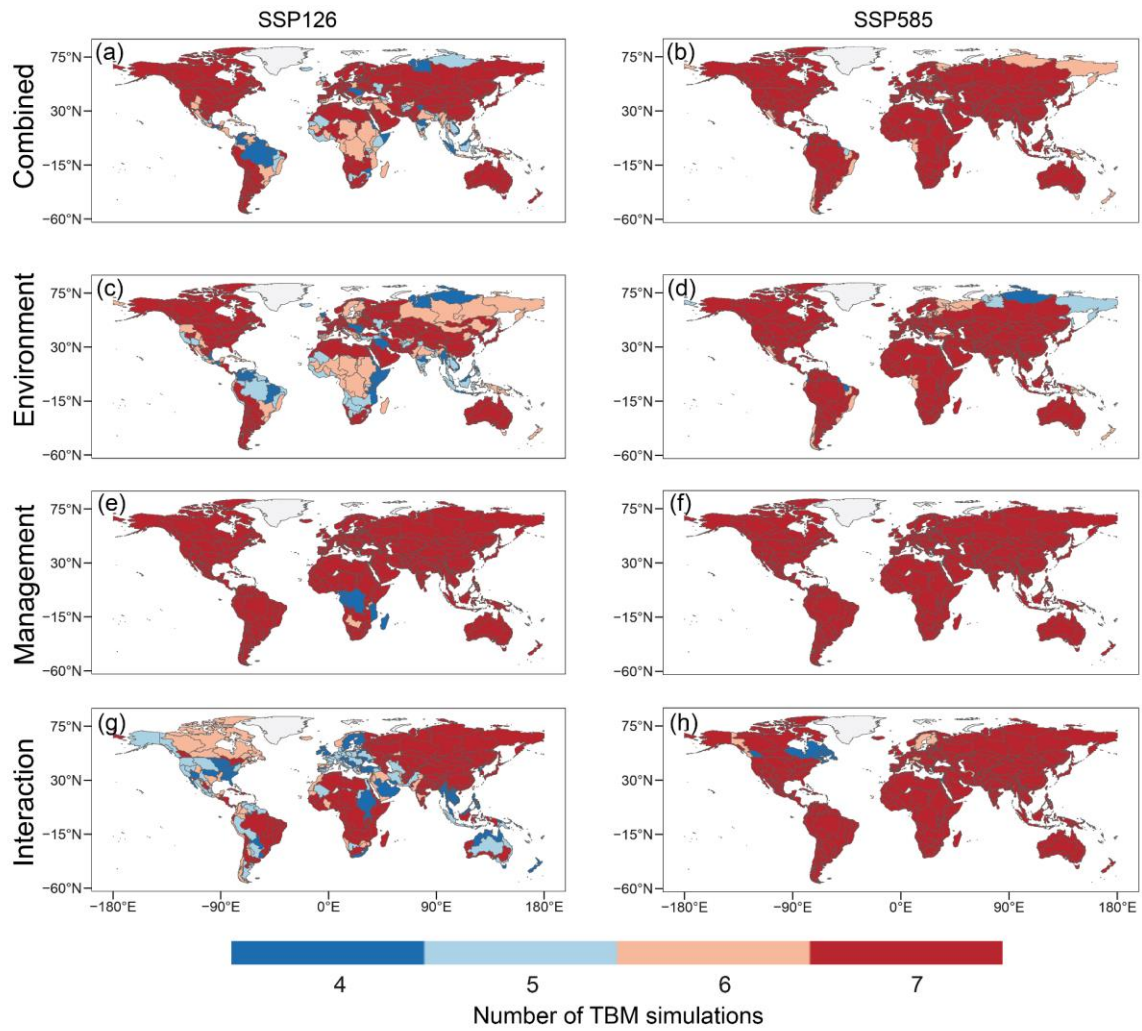

289

290 **Fig. S14.** Number of experiments using different TBM simulations that show a consistent  
 291 direction of total natural land change in 2100 under SSP126 and SSP585.

292

293

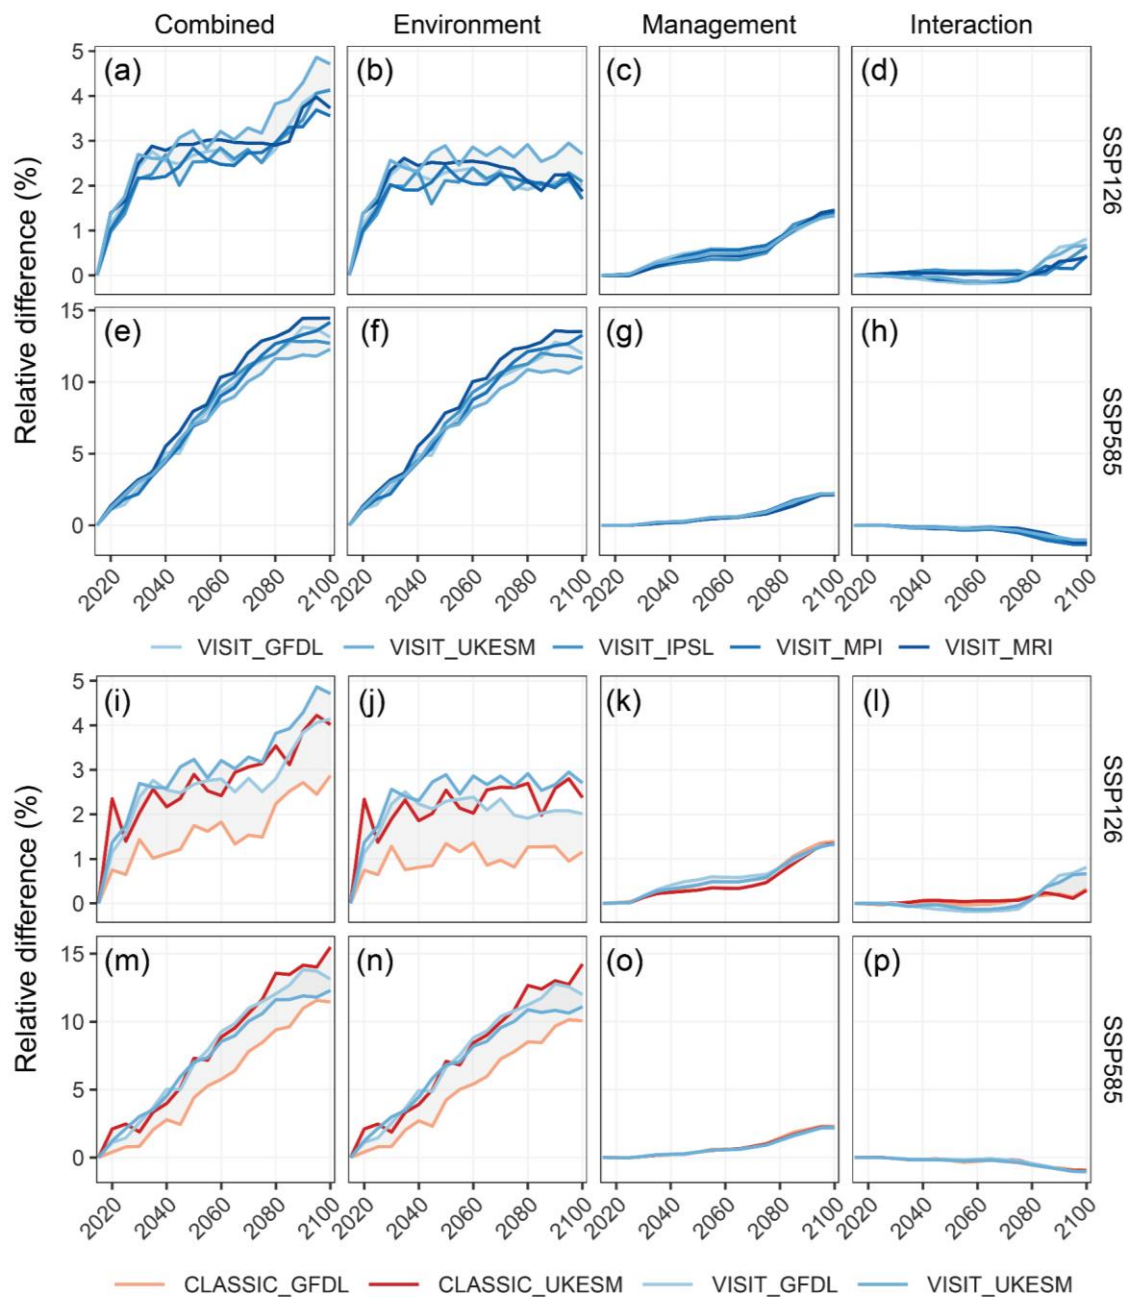

294

295 **Fig. S15.** Uncertainty in natural land change arising from carbon stock changes estimated  
 296 using (a–h) different ESM climate forcings and (i–p) different TBMs. Colour tones  
 297 distinguish simulations: red shades represent CLASSIC and blue shades represent VISIT,  
 298 with lighter to darker tones corresponding to simulations driven by GFDL, UKESM, IPSL,  
 299 MPI, and MRI. Panels (a–h) show results from the full ensemble of TBM–ESM climate-  
 300 forcing combinations, whereas panels (i–p) show results from matched TBM–ESM  
 301 simulations in which both TBMs are driven by the same ESM climate forcing. Panels (a–d)  
 302 and (i–l) show results under SSP126, and panels (e–h) and (m–p) show results under SSP585.  
 303 Panels (a, e, i, m) present the combined effect; panels (b, f, j, n) the environmental change  
 304 effect; (c, g, k, o) the forest management effect; and panels (d, h, l, p) the interaction effect on  
 305 natural land from 2015 to 2100.

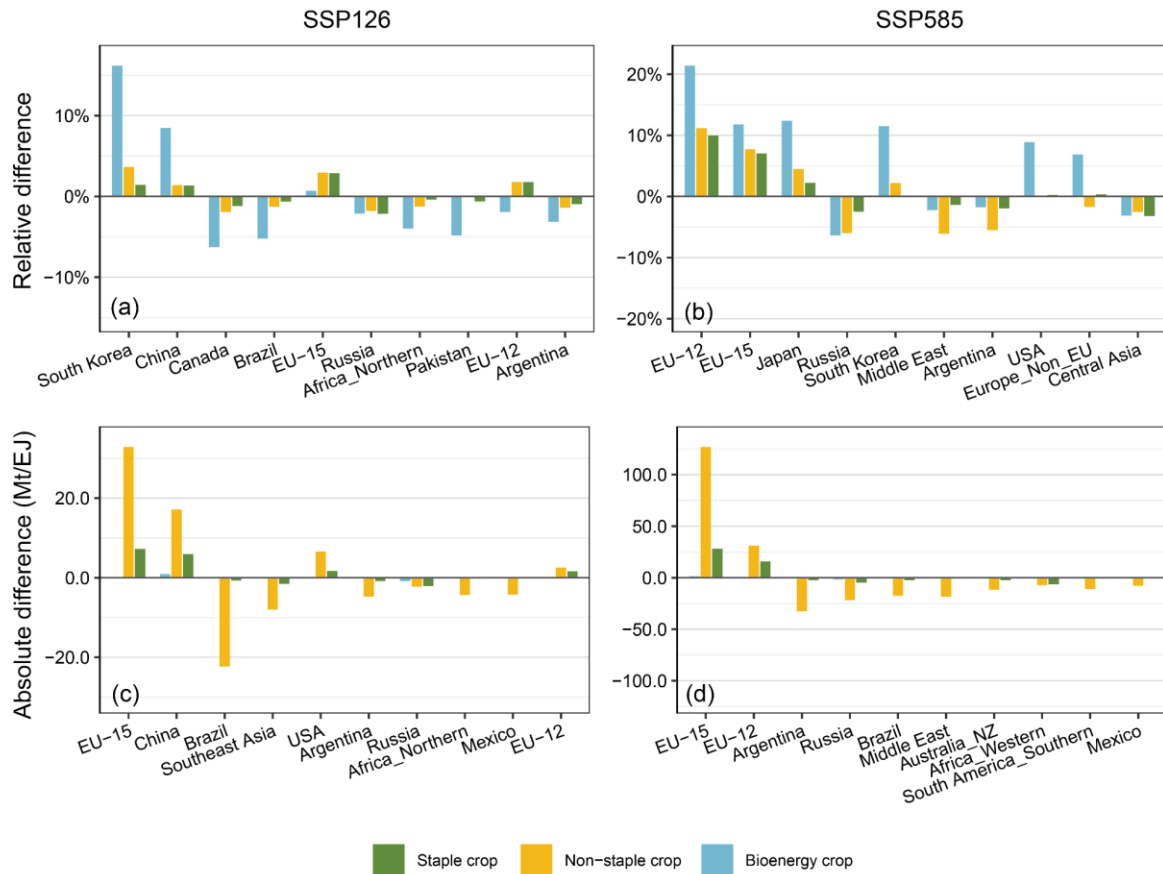

306

307 **Fig. S16.** Combined effects of environmental change and forest management on agricultural  
 308 production, shown as relative and absolute changes (based on the ensemble mean of VISIT-  
 309 driven GCAM simulations). Regions are ordered from left to right according to the summed  
 310 absolute or relative differences across the three production types. Results are shown for the  
 311 ten GCAM regions with the largest changes. Countries within each region are listed in Table  
 312 S1, and the spatial distribution of GCAM regions is shown in Fig. S2.

313

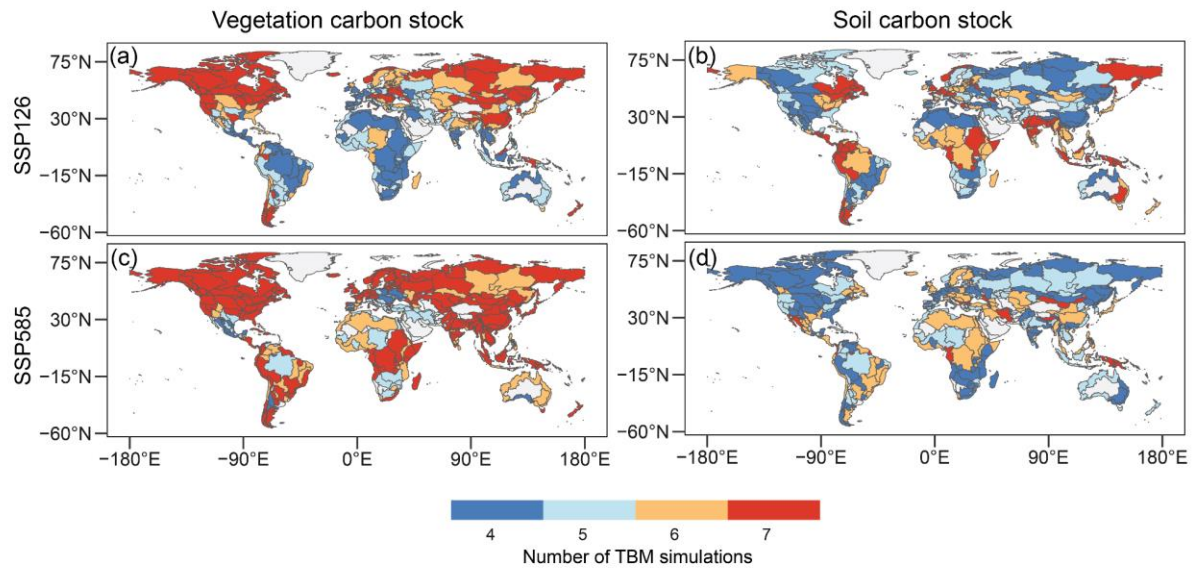

314

315 **Fig. S17.** Number of TBM simulations showing a consistent direction of environmentally  
 316 induced relative change in forest vegetation carbon stocks (left) and forest soil carbon stocks  
 317 (right) in 2100 under SSP126 and SSP585.

318

319

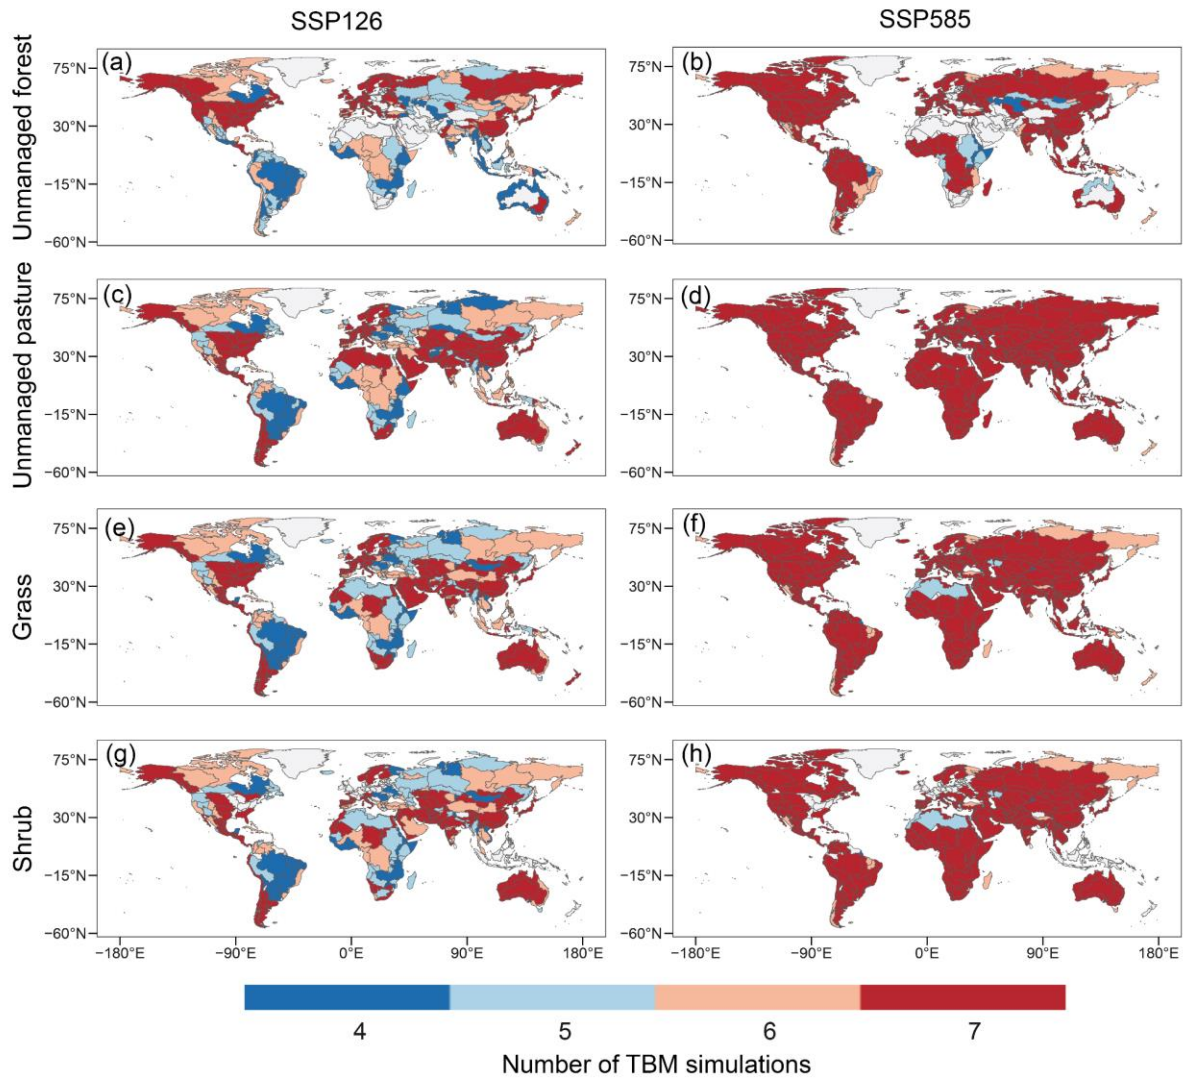

320

321 **Fig. S18.** Number of experiments using different TBM simulations as inputs that show a  
 322 consistent direction of area change for each detailed natural land use type in 2100 under  
 323 SSP126 and SSP585.

324

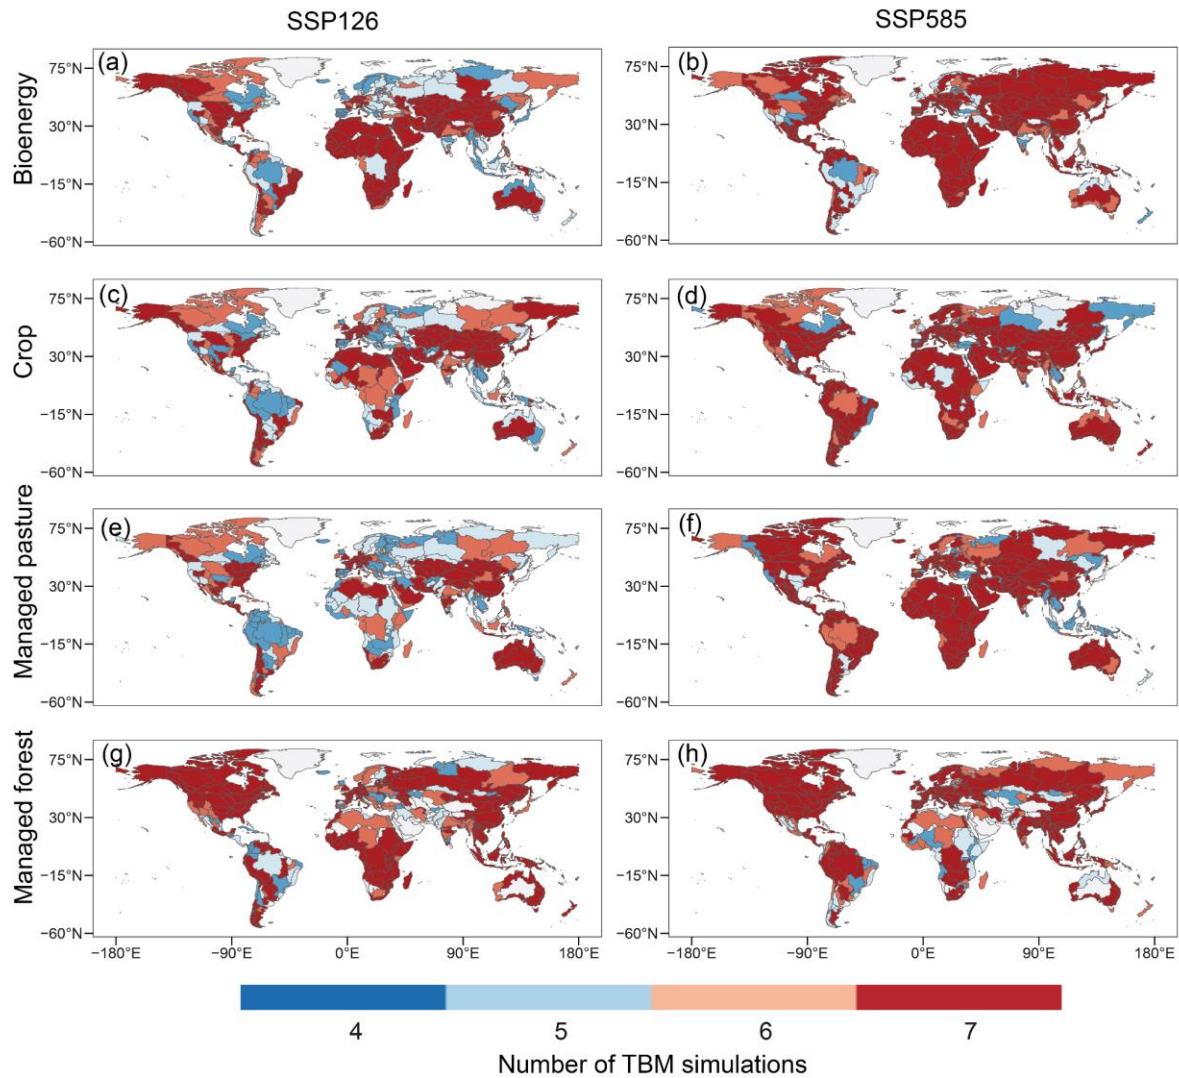

325  
 326  
 327  
 328  
 329

**Fig. S19.** Number of experiments using different TBM simulations that show a consistent direction of area change for each detailed managed land use type in 2100 under SSP126 and SSP585.

330 **Reference**

- 331 1. Todd-Brown, K., Zheng, B. & Crowther, T. W. Field-warmed soil carbon changes imply  
332 high 21st-century modeling uncertainty. *Biogeosciences* **15**, 3659–3671 (2018).
- 333 2. Xu, W. *et al.* Reducing uncertainties of future global soil carbon responses to climate and  
334 land use change with emergent constraints. *Glob. Biogeochem. Cycles* **34**, 2020 006589  
335 (2020).
- 336 3. Shi, Z., Crowell, S., Luo, Y. & Moore III, B. Model structures amplify uncertainty in  
337 predicted soil carbon responses to climate change. *Nat. Commun.* **9**, 2171 (2018).
- 338 4. Daigneault, A. & Favero, A. Global forest management, carbon sequestration and  
339 bioenergy supply under alternative shared socioeconomic pathways. *Land Use Policy*  
340 **103**, 105302 (2021).
- 341 5. Favero, A., Daigneault, A. & Sohngen, B. Forests: Carbon sequestration, biomass energy,  
342 or both? *Sci. Adv.* **6**, 6792 (2020).
- 343 6. Daigneault, A. *et al.* How the future of the global forest sink depends on timber demand,  
344 forest management, and carbon policies. *Glob. Environ. Change* **76**, 102582 (2022).
- 345 7. Tian, X., Sohngen, B., Baker, J., Ohrel, S. & Fawcett, A. A. Will US forests continue to  
346 be a carbon sink? *Land Econ.* **94**, 97–113 (2018).
